# Supplementary material
Source: PubMed Central journal article supplement (PMC6985752)
Supplement: AAC.01495-19-s0001.pdf [file AAC.01495-19-s0001.pdf]

Figure S2. Correlation between polymyxin B and colistin MIC values when testing 15,377 Gram-negative bacilli collected worldwide in 2013, including 3821 *P. aeruginosa*, 1068 *Acinetobacter* spp., 4177 *Klebsiella* spp., and 6311 *E. coli*. Boxes with bold solid lines indicate number of strains with the same MIC value for colistin and polymyxin B. Dashed lines indicate susceptible breakpoints for *P. aeruginosa* and *Acinetobacter* spp. according to the contemporary CLSI criteria (from Sader HS, Rhomberg PR, Farrell DJ, and Jones RN, 2015, Differences in potency and categorical agreement between colistin and polymyxin B when testing 15,377 clinical strains collected worldwide. *Diagn Microbiol Infect Dis* 83:379-381).

|                      |       |                       |      |      |      |      |      |    |    |     |
|----------------------|-------|-----------------------|------|------|------|------|------|----|----|-----|
| Colistin MIC (µg/mL) | >8    |                       |      |      |      |      |      | 5  | 35 | 105 |
|                      | 8     |                       |      |      |      |      | 1    | 28 | 16 | 1   |
|                      | 4     |                       |      |      | 1    | 3    | 16   | 25 | 3  |     |
|                      | 2     |                       |      |      | 3    | 220  | 1544 | 3  | 1  | 1   |
|                      | 1     |                       |      |      | 158  | 2745 | 398  |    |    |     |
|                      | 0.5   |                       |      | 19   | 3695 | 2376 | 5    | 1  |    |     |
|                      | 0.25  |                       | 3    | 487  | 3325 | 95   | 7    |    |    |     |
|                      | 0.12  |                       | 4    | 42   | 4    |      |      |    |    |     |
|                      | ≤0.06 |                       | 2    | 1    |      |      |      |    |    |     |
|                      |       | ≤0.06                 | 0.12 | 0.25 | 0.5  | 1    | 2    | 4  | 8  | >8  |
|                      |       | Polymyxin MIC (µg/mL) |      |      |      |      |      |    |    |     |
